# Supplementary material for: Large-scale suppression of recombination predates genomic rearrangements in Neurospora tetrasperma
Source: PubMed Central journal article supplement (PMC5658415; doi:10.1038/s41467-017-01317-6), 2017-10-26
Supplement: 41467_2017_1317_MOESM1_ESM.pdf [file 41467_2017_1317_MOESM1_ESM.pdf]

# Supplementary Material

9033 A, *N. tetrasperma*, L1

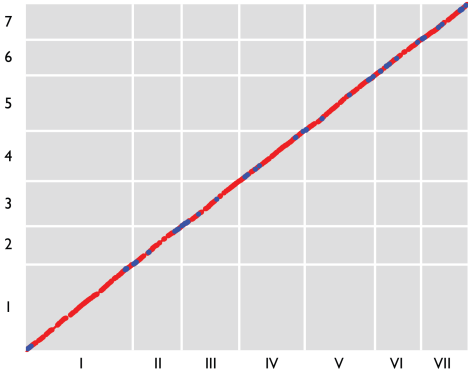

9034 a, *N. tetrasperma*, L1

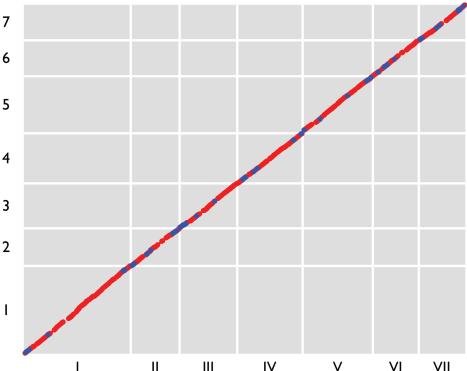

CJ73 A, *N. tetrasperma*, L7

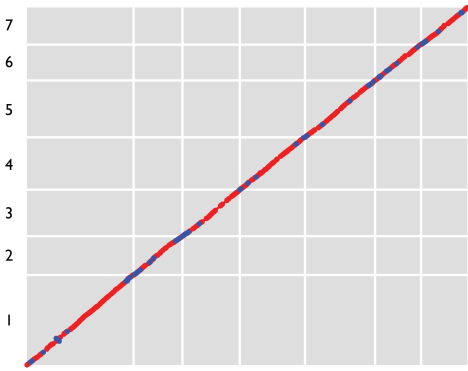

CJ74 a, *N. tetrasperma*, L7

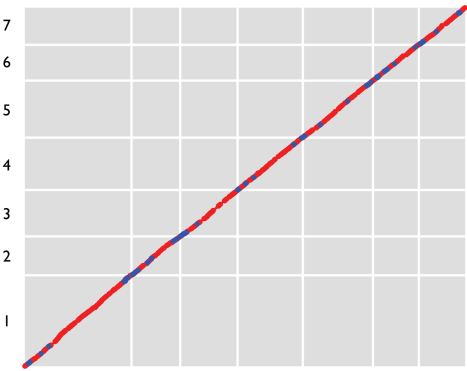

CJ85 A, *N. tetrasperma*, L8

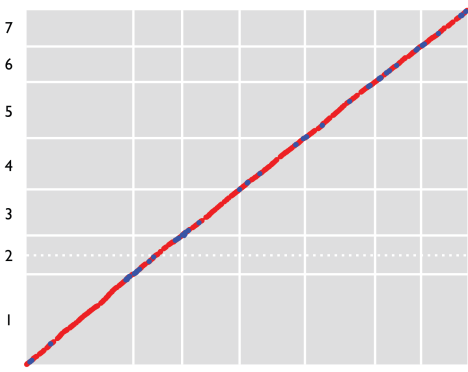

CJ86 a, *N. tetrasperma*, L8

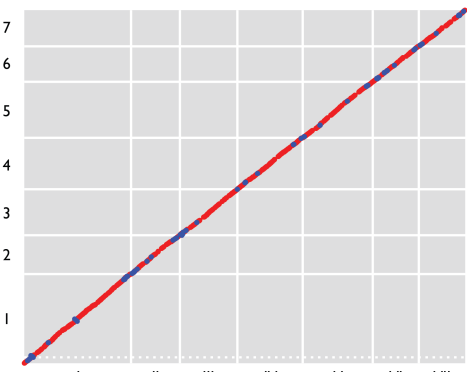

Supplementary Figure 1

## Supplementary Figure 1 (continued)

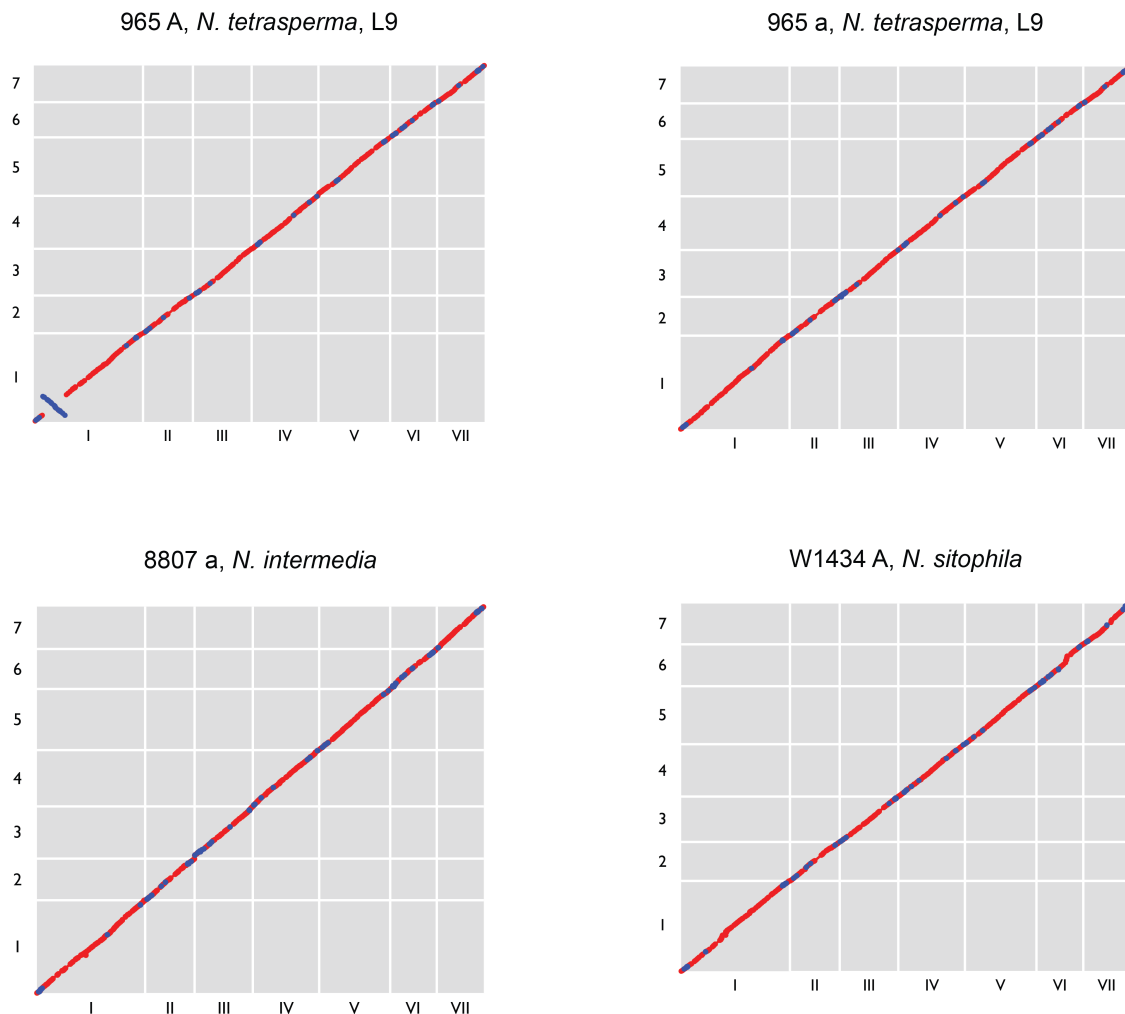

### Supplementary Figure 1. Dotplot showing whole genome pairwise alignments between all strains sequenced for this study and the *N. crassa* OR74A assembly.

The seven chromosomes of *N. crassa* (I-VII) are shown at the bottom of each plot and the corresponding chromosomes of the sequenced strains (1-7) are shown on the left. Red dots signify collinear alignment blocks and blue dots signify inverted. A number of smaller inversions are found in all strains, but the majority are smaller than 20 kbp and large scale gene order is well conserved between the sequenced strains. Even *N. intermedia* 8807, which is estimated to have diverged from the other strains  $\sim 3$  MYA<sup>1</sup>, does not show an elevated number of inversions.

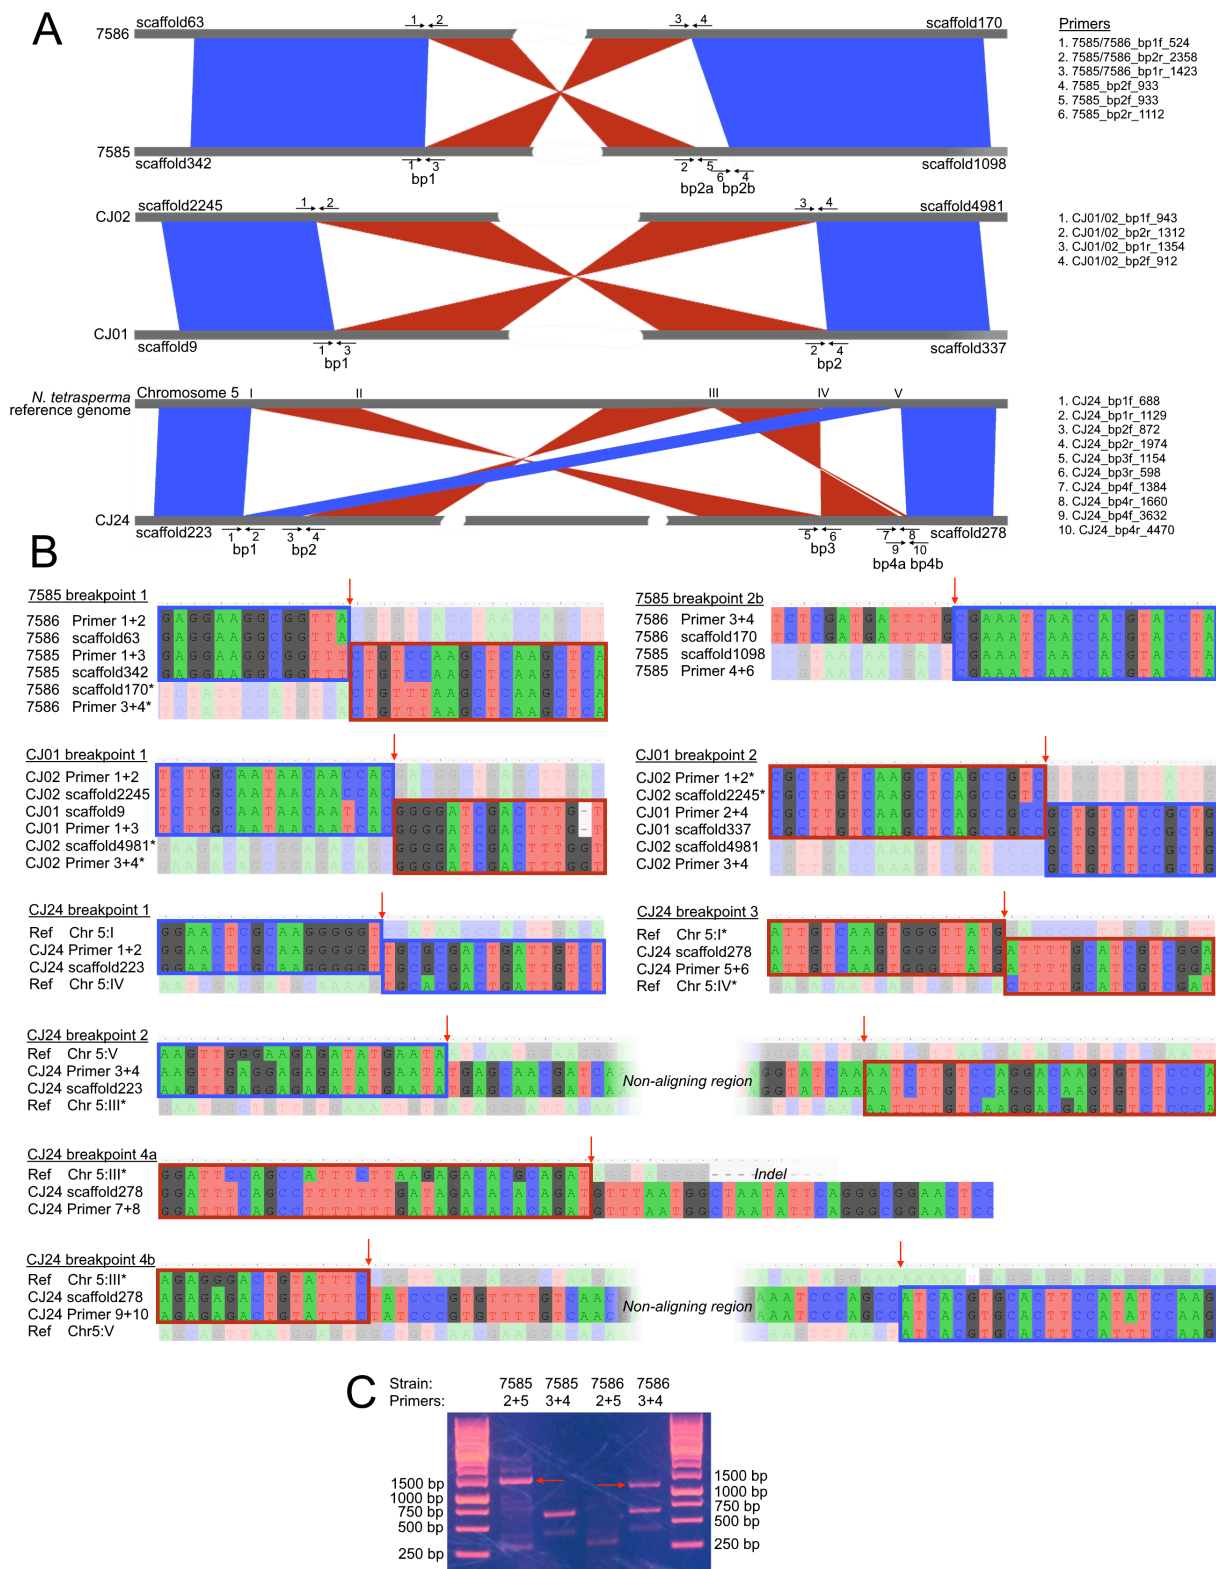

**Supplementary Figure 2. Verification of inversions detected from Illumina data through PCR and Sanger sequencing.**

(A) Map of inversions in 7585, CJ01 and CJ24 with approximate primer binding sites, targeting inversion breakpoints. Not drawn to scale. (B) Multiple sequence alignments of

genomic scaffolds and Sanger sequences across inversion breakpoints. Blue boxes represent collinear alignments and red boxes inverted alignments compared to reverse complemented sequences (\*). Breakpoints are marked by an arrow. CJ24 breakpoints 2 and 4b contain regions up to a few hundred bp that do not align to the reference genome, making the exact breakpoint location impossible to pinpoint. These regions have been contracted in the figure, flanked by red arrows. (C) Verification of 7585 breakpoint 2a through PCR, because of sequencing complications. Expected product lengths can be obtained by subtracting the primer binding site coordinates (given at the end of primer ID's) from each other. Products contain some misprimed amplicons. Nevertheless, the same primer combinations caused the same misprimed amplicons regardless of strain, and unique bands of expected sizes were also obtained (marked by red arrows).

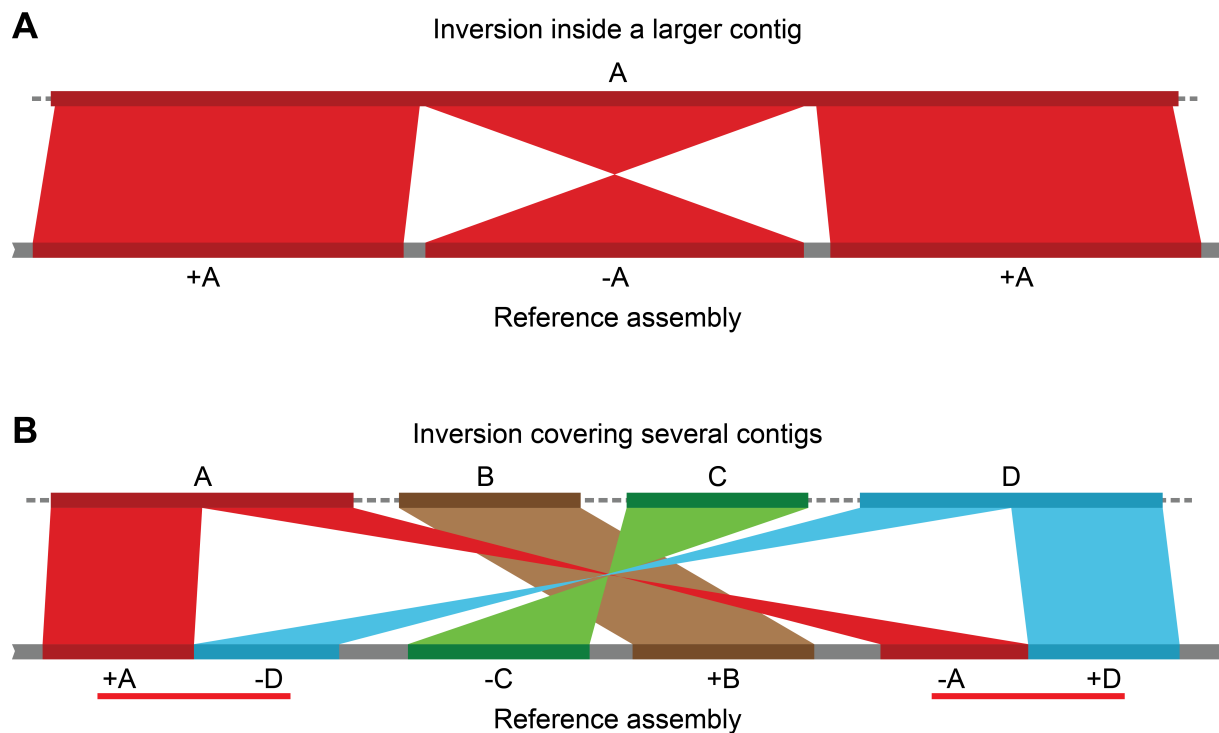

**Supplementary Figure 3. Schematic model of method used for identifying inversions from fragmented *de novo* assemblies.**

Inversions can be found by aligning two genome assemblies to each other, even if one of them is a highly fragmented *de novo* assembly. **(A)** If an inversion is located entirely within a contig of one assembly, it is possible to identify it as a block that aligns in the opposite direction compared to the rest of the contig (here marked as -A instead of +A) when aligned to the other assembly. **(B)** When inversions span several contigs, finding the exact size is more difficult. But if both inversion breakpoints are located within two different contigs, it will produce a specific alignment pattern that can be identified. In the figure, we show a fragmented assembly consisting of contigs A-D and carrying an inversion starting within contig A and ending within contig D. When aligned to a non-fragmented assembly, contig A and D will be aligned next to each other at both inversion breakpoints (red underlined regions). Contig A will be aligned adjacent to the 5'-end of D at both breakpoints with switched alignment direction (here shown with + or -) compared to the other breakpoint. Since a *de novo* genome assembler will produce contigs assembled in a random direction, A and D can share the same direction at one breakpoint (for example +A,+D), but they will then both be aligned in the other direction at the other breakpoint (-A,-D). For the same reason, the alignment direction of any contigs placed between A and D will be uninformative when identifying inversions.

**Supplementary Table 1. Optical Mapping scaffold placement statistics and data availability for three *N. tetrasperma* genomes.[1]**

| Strain | Num placed contigs | Total size placed contigs (Mbp) | Genome covered (%) | Average gap size (Kbp) | Physical depth | SRA accessions [2]     |
|--------|--------------------|---------------------------------|--------------------|------------------------|----------------|------------------------|
| 9033   | 85                 | 35.0                            | 90.0               | 41.6                   | ~321 X         | SRX485184<br>SRX485178 |
| 9034   | 98                 | 34.2                            | 86.1               | 47.2                   | ~90 X          | SRX485185<br>SRX485178 |
| 965A   | 51                 | 36.7                            | 91.9               | 41.0                   | ~380 X         | SRX485186<br>SRX485182 |

[1] The completed genome assemblies are available at <https://dx.doi.org/10.6084/m9.figshare.5327515.v1><sup>2</sup>.

[2] Sequence Read Archive accessions for mate-pair and paired end Illumina HiSeq reads.

**Supplementary Table 2. PacBio sequencing assembly statistics and data availability for five sequenced *N. tetrasperma* genomes and one each of *N. sitophila* and *N. intermedia*. [1]**

| Strain | Species               | Number of unitigs | Number of placed unitigs[2] | Assembly size (Mbp) | Mean subread length | Mean read depth |
|--------|-----------------------|-------------------|-----------------------------|---------------------|---------------------|-----------------|
| CJ85   | <i>N. tetrasperma</i> | 29                | 8                           | 38.5                | 6273                | 89.9 X          |
| CJ86   | <i>N. tetrasperma</i> | 37                | 8                           | 38.6                | 6996                | 88.0 X          |
| CJ73   | <i>N. tetrasperma</i> | 27                | 7                           | 39.0                | 6996                | 74.8 X          |
| CJ74   | <i>N. tetrasperma</i> | 16                | 7                           | 38.9                | 7102                | 63.7 X          |
| 965a   | <i>N. tetrasperma</i> | 24                | 7                           | 38.6                | 6446                | 59.1 X          |
| W1434  | <i>N. sitophila</i>   | 15                | 7                           | 39.2                | 7460                | 80.2 X          |
| 8807   | <i>N. intermedia</i>  | 14                | 7                           | 41.3                | 6884                | 69.3 X          |

[1] The completed genome assemblies are available at <https://dx.doi.org/10.6084/m9.figshare.5327515.v1><sup>2</sup>. Raw PacBio reads have been deposited in the Sequence Read Archive as BioProject PRJNA398702.

[2] Number of unitigs that align to the seven chromosomes of the *N. crassa* OR74 reference assembly<sup>3</sup>.

**Supplementary Table 3. *De novo* assembly statistics for the 92 *N. tetrasperma* strains from Corcoran et al, 2016<sup>4</sup>.[1]**

| Strain | Assembly statistics |                 |                    |           |           |                  |          |                |
|--------|---------------------|-----------------|--------------------|-----------|-----------|------------------|----------|----------------|
|        | Mating type         | Total # contigs | Total length (Mbp) | N50 (kbp) | N90 (kbp) | Max length (kbp) | Coverage | Genomic GC (%) |
| 7585   | A                   | 1155            | 36.7               | 105.1     | 20.98     | 488.4            | ~30 X    | 50.7           |
| 7586   | a                   | 1207            | 36.4               | 86.25     | 19.66     | 415.2            | ~30 X    | 50.8           |
| 9033   | A                   | 297             | 37.3               | 608.7     | 141.8     | 1739             | ~30 X    | 50.7           |
| 9034   | a                   | 333             | 38.1               | 598.6     | 126.9     | 1518             | ~50 X    | 50.8           |
| 965A   | A                   | 242             | 38.1               | 1141      | 358.9     | 2403             | ~50 X    | 50.1           |
| 965a   | a                   | 391             | 37.9               | 496.0     | 121.6     | 2049             | ~30 X    | 50.8           |
| CJ01   | A                   | 718             | 37.9               | 193.3     | 51.47     | 943.9            | ~30 X    | 49.9           |
| CJ02   | a                   | 18421           | 42.7               | 101.2     | 0.954     | 1261             | ~30 X    | 49.8           |
| CJ03   | A                   | 754             | 37.9               | 188.9     | 46.51     | 748.7            | ~30 X    | 49.9           |
| CJ04   | a                   | 2144            | 37.6               | 163.9     | 25.23     | 831.1            | ~30 X    | 49.9           |
| CJ05   | A                   | 622             | 37.9               | 217.2     | 63.86     | 911.1            | ~30 X    | 49.9           |
| CJ06   | a                   | 606             | 37.9               | 252.9     | 73.21     | 945.2            | ~30 X    | 49.9           |
| CJ07   | A                   | 6849            | 39.9               | 204.0     | 9.591     | 1101             | ~30 X    | 49.6           |
| CJ08   | a                   | 650             | 37.8               | 217.5     | 62.36     | 1090             | ~30 X    | 49.9           |
| CJ09   | A                   | 721             | 37.9               | 226.3     | 53.16     | 631.8            | ~30 X    | 49.8           |
| CJ10   | a                   | 628             | 37.8               | 237.8     | 70.49     | 870.5            | ~30 X    | 49.9           |
| CJ11   | A                   | 4426            | 39.2               | 177.5     | 38.77     | 682.1            | ~30 X    | 49.7           |
| CJ12   | a                   | 4028            | 39.0               | 178.0     | 31.06     | 587.9            | ~30 X    | 49.7           |
| CJ13   | A                   | 621             | 38.0               | 236.1     | 73.73     | 1089             | ~30 X    | 49.8           |
| CJ14   | a                   | 770             | 37.9               | 224.9     | 70.48     | 1103             | ~30 X    | 50.0           |



|      |   |       |      |       |       |       |       |      |
|------|---|-------|------|-------|-------|-------|-------|------|
| CJ15 | A | 584   | 37.9 | 232.9 | 70.13 | 873.5 | ~30 X | 49.9 |
| CJ16 | a | 633   | 37.9 | 230.9 | 69.06 | 766.7 | ~30 X | 49.9 |
| CJ17 | A | 34302 | 47.8 | 23.66 | 0.538 | 852.2 | ~30 X | 49.4 |
| CJ18 | a | 22969 | 44.9 | 80.80 | 0.681 | 851.4 | ~30 X | 49.4 |
| CJ19 | A | 641   | 38.0 | 219.0 | 55.40 | 765.7 | ~30 X | 49.8 |
| CJ20 | a | 603   | 37.7 | 216.5 | 68.77 | 765.0 | ~30 X | 50.0 |
| CJ21 | A | 11166 | 41.0 | 138.4 | 2.607 | 944.1 | ~30 X | 49.7 |
| CJ22 | a | 1699  | 38.0 | 200.0 | 53.06 | 1146  | ~30 X | 50.0 |
| CJ23 | A | 1438  | 38.1 | 159.7 | 30.36 | 595.0 | ~30 X | 50.0 |
| CJ24 | a | 1023  | 38.1 | 206.6 | 58.95 | 1083  | ~30 X | 49.9 |
| CJ25 | A | 640   | 39.0 | 211.7 | 62.80 | 1277  | ~30 X | 49.3 |
| CJ26 | a | 749   | 38.5 | 177.8 | 53.76 | 1278  | ~30 X | 49.6 |
| CJ27 | A | 988   | 39.1 | 172.4 | 46.78 | 842.2 | ~30 X | 49.3 |
| CJ28 | a | 775   | 38.6 | 172.5 | 58.96 | 885.3 | ~30 X | 49.5 |
| CJ29 | A | 972   | 38.9 | 163.7 | 45.08 | 1149  | ~30 X | 49.4 |
| CJ30 | a | 731   | 38.5 | 192.6 | 50.89 | 1066  | ~30 X | 49.6 |
| CJ31 | A | 1111  | 39.2 | 224.4 | 66.76 | 941.1 | ~30 X | 49.2 |
| CJ32 | a | 1610  | 38.6 | 196.4 | 53.81 | 874.2 | ~30 X | 49.5 |
| CJ33 | A | 1072  | 39.1 | 155.7 | 40.97 | 684.3 | ~30 X | 49.3 |
| CJ34 | a | 1003  | 38.7 | 149.4 | 43.21 | 569.7 | ~30 X | 49.6 |
| CJ35 | A | 1566  | 38.3 | 65.19 | 18.42 | 235.2 | ~30 X | 49.6 |
| CJ36 | a | 1259  | 38.5 | 139.9 | 34.80 | 805.0 | ~30 X | 49.7 |
| CJ37 | A | 703   | 39.4 | 190.7 | 60.07 | 784.5 | ~30 X | 49.1 |
| CJ38 | a | 711   | 38.6 | 177.8 | 68.38 | 795.5 | ~30 X | 49.6 |
| CJ39 | A | 668   | 39.1 | 254.6 | 66.56 | 778.2 | ~30 X | 49.2 |

|      |   |       |      |       |       |       |       |      |
|------|---|-------|------|-------|-------|-------|-------|------|
| CJ40 | a | 759   | 38.5 | 187.8 | 54.20 | 766.3 | ~30 X | 49.6 |
| CJ41 | A | 2179  | 38.8 | 56.18 | 14.53 | 294.0 | ~30 X | 49.5 |
| CJ42 | a | 751   | 38.6 | 181.9 | 56.64 | 863.0 | ~30 X | 49.5 |
| CJ43 | A | 2388  | 38.7 | 81.48 | 17.44 | 320.5 | ~30 X | 49.7 |
| CJ44 | a | 1270  | 38.5 | 141.8 | 37.37 | 472.8 | ~30 X | 49.7 |
| CJ45 | A | 2387  | 38.7 | 49.45 | 12.92 | 235.8 | ~30 X | 49.5 |
| CJ46 | a | 725   | 38.5 | 203.9 | 62.48 | 941.5 | ~30 X | 49.6 |
| CJ47 | A | 768   | 39.1 | 182.3 | 54.09 | 917.8 | ~30 X | 49.2 |
| CJ48 | a | 913   | 39.1 | 194.6 | 56.22 | 959.9 | ~30 X | 49.2 |
| CJ49 | A | 791   | 39.5 | 194.4 | 64.85 | 1048  | ~30 X | 49.1 |
| CJ50 | a | 1064  | 38.5 | 178.3 | 53.95 | 770.1 | ~30 X | 49.4 |
| CJ51 | A | 3126  | 38.2 | 50.19 | 10.30 | 249.0 | ~30 X | 49.9 |
| CJ52 | a | 16060 | 43.7 | 109.1 | 1.150 | 601.4 | ~30 X | 49.3 |
| CJ55 | A | 2523  | 37.5 | 97.87 | 18.19 | 369.9 | ~40 X | 50.4 |
| CJ56 | a | 2369  | 37.9 | 109.1 | 18.19 | 556.6 | ~40 X | 50.2 |
| CJ57 | A | 1856  | 37.9 | 123.7 | 23.01 | 562.2 | ~40 X | 50.4 |
| CJ58 | a | 1721  | 38.0 | 121.4 | 22.33 | 441.6 | ~30 X | 50.3 |
| CJ59 | A | 1613  | 37.9 | 121.5 | 24.82 | 495.6 | ~40 X | 50.3 |
| CJ60 | a | 2023  | 37.7 | 113.6 | 21.23 | 444.1 | ~40 X | 50.4 |
| CJ61 | A | 1632  | 38.1 | 112.3 | 24.24 | 528.6 | ~30 X | 50.2 |
| CJ62 | a | 1290  | 38.1 | 133.1 | 29.32 | 670.4 | ~40 X | 50.2 |
| CJ63 | A | 1806  | 38.0 | 117.0 | 21.88 | 613.2 | ~40 X | 50.3 |
| CJ64 | a | 1374  | 38.2 | 141.5 | 27.84 | 677.7 | ~40 X | 50.2 |
| CJ65 | A | 1445  | 37.9 | 125.0 | 28.95 | 626.5 | ~40 X | 50.0 |
| CJ66 | a | 2262  | 37.9 | 106.3 | 19.56 | 556.8 | ~40 X | 50.1 |

|      |   |       |      |       |       |       |       |      |
|------|---|-------|------|-------|-------|-------|-------|------|
| CJ67 | A | 2004  | 38.2 | 109.3 | 20.18 | 502.6 | ~40 X | 50.2 |
| CJ68 | a | 1660  | 38.1 | 122.3 | 23.18 | 674.1 | ~30 X | 50.3 |
| CJ69 | A | 2286  | 38.1 | 100.2 | 18.09 | 451.1 | ~40 X | 50.1 |
| CJ70 | a | 1602  | 38.6 | 107.5 | 26.68 | 514.7 | ~40 X | 49.8 |
| CJ71 | A | 2015  | 38.1 | 129.1 | 21.47 | 457.6 | ~40 X | 50.3 |
| CJ72 | a | 1377  | 38.2 | 131.5 | 29.23 | 669.5 | ~40 X | 50.2 |
| CJ73 | A | 2222  | 38.4 | 111.5 | 17.56 | 421.5 | ~30 X | 50.0 |
| CJ74 | a | 2103  | 38.5 | 101.5 | 20.04 | 415.8 | ~40 X | 49.9 |
| CJ75 | A | 1486  | 38.4 | 102.2 | 25.45 | 434.4 | ~40 X | 50.1 |
| CJ76 | a | 1464  | 38.2 | 134.5 | 27.43 | 669.3 | ~40 X | 50.2 |
| CJ77 | A | 1209  | 38.3 | 116.2 | 31.49 | 425.7 | ~40 X | 50.1 |
| CJ78 | a | 2599  | 36.3 | 92.69 | 21.49 | 325.6 | ~40 X | 51.4 |
| CJ79 | A | 2139  | 38.2 | 105.6 | 19.01 | 356.4 | ~40 X | 50.4 |
| CJ80 | a | 2805  | 36.7 | 81.81 | 18.60 | 468.4 | ~40 X | 51.2 |
| CJ81 | A | 1413  | 38.4 | 112.2 | 26.31 | 479.8 | ~40 X | 49.9 |
| CJ82 | a | 1622  | 38.5 | 110.5 | 25.69 | 392.7 | ~30 X | 49.9 |
| CJ83 | A | 2023  | 38.4 | 101.8 | 19.95 | 401.6 | ~30 X | 50.1 |
| CJ84 | a | 1166  | 38.6 | 142.5 | 36.23 | 591.3 | ~40 X | 49.7 |
| CJ85 | A | 2305  | 38.0 | 109.1 | 18.31 | 549.6 | ~40 X | 50.4 |
| CJ86 | a | 1605  | 38.0 | 119.2 | 24.33 | 524.8 | ~40 X | 50.3 |
| CJ87 | A | 17459 | 41.7 | 72.31 | 0.963 | 437.3 | ~30 X | 50.3 |
| CJ88 | a | 16892 | 42.3 | 71.21 | 1.045 | 437.8 | ~30 X | 50.1 |

---

[1] The assembled genomes are available at  
<https://dx.doi.org/10.6084/m9.figshare.5327809.v1><sup>5</sup>.

**Supplementary Table 4. Inverted regions larger than 100 kbp found in *N. tetrasperma*.**

| Lineage | Strains                        | Chr | Data[1]         | Size (bp) | Start coordinate [2] | End coordinate [2] | Support[3]              |
|---------|--------------------------------|-----|-----------------|-----------|----------------------|--------------------|-------------------------|
| L4      | 7585                           | 1   | Illumina        | 257,012   | 2,304,771            | 2,561,783          | PCR                     |
| L5      | All <i>mat A</i> strains in L5 | 1   | Illumina        | 6,729,785 | 732,329              | 7,462,114          | L6 reference genomes[4] |
| L7      | All <i>mat A</i> strains in L7 | 1   | PacBio          | 318,347   | 6,572,763            | 6,891,110          | Illumina[5]             |
| L8      | All <i>mat a</i> strains in L8 | 1   | PacBio          | 255,806   | 4,805,724            | 5,061,530          | Illumina[5]             |
| L9      | 965A                           | 1   | Optical mapping | 1,941,612 | 6,772,348            | 8,713,960          | Illumina                |
| L10     | CJ01                           | 1   | Illumina        | 3,632,717 | 4,332,431            | 7,965,148          | PCR                     |
| L10     | CJ21, CJ22, CJ23, CJ24         | 5   | Illumina        | 417,226   | 96,060               | 513,286            | PCR                     |

[1] Type of data where inversion was first identified.

[2] Coordinates given for the breakpoint when aligned to the 2509 *mat a* reference genome.<sup>6</sup>

[3] Type of secondary data that supports the identified inversion.

[4] The pattern of inversion breakpoints that is found in all *mat A* strains in lineage 5 corresponds to the inversions that were identified in the lineage 6 2508 *mat A* strain sequenced by Ellison et al.<sup>6</sup>

[5] Only one breakpoint could be confirmed with Illumina, due to a large cluster of repetitive sequences surrounding the other. For the inversion in Lineage 7 the one breakpoint was found in all four *mat A* genomes and for the Lineage 8 inversion, it was found in all nine *mat a* genomes, giving us multiple assembly-independent datapoints.

**Supplementary Table 5. Inversions larger than 1 kb [1] found in *N. tetrasperma*.**

| Chromosome | Start coordinate[2] | End coordinate[2] | Size (bp)   | Number of hits[3] | Location[4]     |
|------------|---------------------|-------------------|-------------|-------------------|-----------------|
| 1          | 279991              | 352979            | 72988       | 22                | recombining     |
| 1          | 548863              | 556097            | 7234        | 57                | recombining     |
| 1          | 732329              | 7462114           | 6729785 [5] | 30                | non-recombining |
| 1          | 2304771             | 2561783           | 257012 [5]  | 1                 | non-recombining |
| 1          | 4332431             | 7965148           | 3632717 [5] | 1                 | non-recombining |
| 1          | 4805724             | 5061530           | 255806 [5]  | 10                | non-recombining |
| 1          | 5738804             | 5755786           | 16982       | 2                 | non-recombining |
| 1          | 6374901             | 6376114           | 1213        | 14                | non-recombining |
| 1          | 6572763             | 6891110           | 318347 [5]  | 4                 | non-recombining |
| 1          | 6772348             | 8713960           | 1941612 [5] | 1                 | non-recombining |
| 1          | 7285213             | 7309212           | 23999       | 21                | non-recombining |
| 1          | 9003634             | 9022861           | 19227       | 5                 | recombining     |
| 1          | 9026355             | 9035333           | 8978        | 38                | recombining     |
| 1          | 9084396             | 9094323           | 9927        | 38                | recombining     |
| 1          | 9190232             | 9193161           | 2929        | 4                 | recombining     |
| 1          | 9291105             | 9294807           | 3702        | 6                 | recombining     |
| 2          | 95622               | 137829            | 42207       | 55                | recombining     |
| 2          | 6040269             | 6052643           | 12374       | 32                | recombining     |
| 3          | 76449               | 94467             | 18018       | 61                | recombining     |
| 3          | 58482               | 105153            | 46671       | 26                | recombining     |
| 3          | 682962              | 721398            | 38436       | 30                | recombining     |
| 3          | 3121685             | 3128792           | 7107        | 3                 | recombining     |
| 3          | 3650653             | 3657421           | 6768        | 2                 | recombining     |
| 3          | 5632546             | 5640449           | 7903        | 41                | recombining     |
| 4          | 2005613             | 2014291           | 8678        | 45                | recombining     |
| 4          | 4357340             | 4401633           | 44293       | 7                 | recombining     |
| 4          | 4730416             | 4735395           | 4979        | 54                | recombining     |
| 4          | 4734740             | 4749514           | 14774       | 9                 | recombining     |
| 4          | 4756352             | 4770430           | 14078       | 28                | recombining     |
| 4          | 4864863             | 4882478           | 17615       | 8                 | recombining     |

|   |         |         |            |    |             |
|---|---------|---------|------------|----|-------------|
| 5 | 96060   | 513286  | 417226 [5] | 4  | recombining |
| 5 | 499226  | 514523  | 15297      | 49 | recombining |
| 5 | 535228  | 556550  | 21322      | 54 | recombining |
| 5 | 1833051 | 1842914 | 9863       | 44 | recombining |
| 5 | 3673570 | 3691824 | 18254      | 2  | recombining |
| 5 | 3833318 | 3872698 | 39380      | 18 | recombining |
| 6 | 123407  | 128291  | 4884       | 13 | recombining |
| 6 | 163494  | 213506  | 50012      | 2  | recombining |
| 6 | 261829  | 305573  | 43744      | 2  | recombining |
| 6 | 516684  | 532300  | 15616      | 56 | recombining |
| 6 | 606365  | 693014  | 86649      | 31 | recombining |
| 6 | 2182836 | 2184719 | 1883       | 36 | recombining |
| 6 | 2516527 | 2540516 | 23989      | 36 | recombining |
| 6 | 3549368 | 3596893 | 47525      | 8  | recombining |
| 6 | 3650045 | 3658661 | 8616       | 22 | recombining |
| 7 | 325569  | 351901  | 26332      | 42 | recombining |
| 7 | 1098423 | 1149434 | 51011      | 2  | recombining |
| 7 | 1111255 | 1149434 | 38179      | 61 | recombining |
| 7 | 3414311 | 3418916 | 4605       | 28 | recombining |
| 7 | 3494575 | 3523457 | 28882      | 10 | recombining |
| 7 | 3632500 | 3645415 | 12915      | 2  | recombining |

---

[1] Only inversions found in at least two different strains are included, with the exception of inversions larger than 100 kb shown in Supplementary Table 4.

[2] Start and end coordinates were defined as the last non-inverted base before the inverted region, and the first non-inverted base after.

[3] The number of strains that the inversion was identified by aligning to 2509 a reference genome. Only inversions found in at least two strains, or those verified by PCR or PacBio sequencing were included.

[4] Inversion located in the freely recombining region or in the non-recombining region.

[5] For further details of inversions larger than 100 kb, see Supplementary Table 3.

**Supplementary Table 6. Primers used for PCR confirmation of newly identified inversions.**

| Primer ID           | Target inversion       | Sequence (5'–3')       | T <sub>m</sub> (°C) |
|---------------------|------------------------|------------------------|---------------------|
| 7585/7586_bp1f_524  | 200 kb, breakpoint 1   | CCATCATCCGCATCCAATAT   | 64.4                |
| 7585/7586_bp1r_1423 | 200 kb, breakpoint 1   | GGGCTGCTACTGATTCTGCT   | 63.4                |
| 7585_bp2f_933       | 200 kb, breakpoint 2   | ATAACAATATGGCCAGCCAG   | 61.3                |
| 7586_bp2f_334       | 200 kb, breakpoint 2   | TGGATGATTGTCATCAGAGG   | 61.2                |
| 7585/7586_bp2r_2358 | 200 kb, breakpoint 2   | AGACCAAGCTGGTTAGGTGA   | 61.3                |
| 7585_bp2r_1112      | 200 kb, breakpoint 2   | AGAAGTCGTCGGTTCAGATG   | 61.2                |
| CJ01_bp1f_943       | 4 Mb, breakpoint 1     | GTGTCAACCTTGTACGACAA   | 56.9                |
| CJ01_bp1r_1354      | 4 Mb, breakpoint 1     | TCGTCTTGATATGACATCCC   | 59.9                |
| CJ01_bp2f_912       | 4 Mb, breakpoint 2     | TCGGATGAATTTGACAAGGA   | 63.0                |
| CJ01_bp2r_1312      | 4 Mb, breakpoint 2     | AGTCAGGGTCATGGCAACTT   | 63.5                |
| CJ24_bp1f_688       | 400 kb, breakpoint 1   | GGAGGCTGATACCGTTGAAC   | 62.7                |
| CJ24_bp1r_1129      | 400 kb, breakpoint 1   | CATTGTGCGCTTCATCCATA   | 63.8                |
| CJ24_bp2f_872       | 400 kb, breakpoint 2   | ATGGTTCAGGATCAGGTCAC   | 60.7                |
| CJ24_bp2r_1974      | 400 kb, breakpoint 2   | CGAAGACGAACAGCAACTCA   | 63.5                |
| CJ24_bp3f_1154      | 400 kb, breakpoint 3   | GTGTTCAGGCCCAAGCAGCT   | 68.1                |
| CJ24_bp3r_598       | 400 kb, breakpoint 3   | CACTTTGCATTGGATCGTGC   | 65.7                |
| CJ24_bp4f_1384      | 400 kb, breakpoint 4.1 | ACTGAGACGAAATGGCTTTG   | 61.2                |
| CJ24_bp4r_1660      | 400 kb, breakpoint 4.1 | GCGTATAAGTACCACAAGCAGC | 61.8                |
| CJ24_bp4f_3632      | 400 kb, breakpoint 4.2 | GGCAATAGCCTTCATCATGT   | 60.8                |
| CJ24_bp4r_4470      | 400 kb, breakpoint 4.2 | CGCTGGCTTGGAAGTATATG   | 61.5                |

## Supplementary References

1. Corcoran, P. *et al.* A global multilocus analysis of the model fungus *Neurospora* reveals a single recent origin of a novel genetic system. *Mol. Phylogenet. Evol.* **78**, 136–147 (2014)
2. Sun, Y., Corcoran, P., Svedberg, J. & Johannesson, H. De novo genome assemblies of *Neurospora tetrasperma* based on Illumina HiSeq reads. Figshare. <https://dx.doi.org/10.6084/m9.figshare.5327809.v1> (2017)
3. Galagan, J. E. *et al.* The genome sequence of the filamentous fungus *Neurospora crassa*. *Nature* **422**, 859–868 (2003).
4. Corcoran, P. *et al.* Introgression maintains the genetic integrity of the mating-type determining chromosome of the fungus *Neurospora tetrasperma*. *Genome Res.* **26**, 486–498 (2016).
5. Sun, Y., Svedberg, J., Hiltunen, M., Corcoran, P. & Johannesson, H. High-quality *Neurospora tetrasperma* genome assemblies. Figshare. <https://dx.doi.org/10.6084/m9.figshare.5327515.v1> (2017)
6. Ellison, C. E. *et al.* Massive changes in genome architecture accompany the transition to self-fertility in the filamentous fungus *Neurospora tetrasperma*. *Genetics* **189**, 55–69 (2011).
